# Supplementary material for: A metal–organic framework with rich accessible nitrogen sites for rapid dye adsorption and highly efficient dehydrogenation of formic acid
Source: Royal Society of Chemistry journal article supplement (doi:10.1039/d2dt00389a), 2022-01-01
Supplement: d2dt00389a1.pdf [file d2dt00389a1.pdf]

## Supporting information

# A metal-organic framework with rich accessible nitrogen sites for rapid dye adsorption and high-efficient dehydrogenation of formic acid

Run-Dong Ding,<sup>a,b</sup> Dan-Dan Li,<sup>a,b</sup> Feng Leng,<sup>a,b</sup> Jie-Hui Yu,<sup>a,b\*</sup> Ming-Jun Jia<sup>a\*</sup> and Ji-Qing Xu<sup>a,b</sup>

<sup>a</sup> College of Chemistry, Jilin University, Changchun, Jilin, 130012, China

<sup>b</sup> State Key Laboratory of Inorganic Synthesis and Preparative Chemistry, Jilin University, Changchun, Jilin, 130012, China

\*E-mail: [jhyu@jlu.edu.cn](mailto:jhyu@jlu.edu.cn); [jiamj@jlu.edu.cn](mailto:jiamj@jlu.edu.cn)

## Materials and physical measurements

All chemicals were of reagent grade quality and obtained from commercial sources without further purification. Cadmium chloride ( $\text{CdCl}_2 \cdot 1.5\text{H}_2\text{O}$ ), N,N-dimethylacetamide ( $\text{C}_4\text{H}_9\text{NO}$ , DMA,  $\geq 99\%$ ), hydrochloric acid (HCl, 37%), formic acid ( $\text{HCOOH}$ ,  $\geq 89\%$ ), acetonitrile and sodium borohydride ( $\text{NaBH}_4$ , 96%) were obtained from Aladdin Chemistry Co., Ltd. Palladium nitrate ( $\text{Pd}(\text{NO}_3)_2$ , AR), chloroauric acid ( $\text{HAuCl}_4 \cdot 4\text{H}_2\text{O}$ , AR), methylene blue, bromocresol purple and methyl orange were bought from Beijing Chemical Works.  $\text{H}_3\text{L}$  (2,4,6-tris(4-carboxyphenyl)-1,3,5-triazine) was purchased from Jinan Heng Hua technology Co., Ltd.

Powder X-ray diffraction (XRD) data were collected on a Rigaku/max-2550 diffractometer with Cu-K $\alpha$  radiation ( $\lambda = 1.5418 \text{ \AA}$ ) at 298 K. Elemental analysis for C, H and N was performed on a Perkin-Elmer 2400LS II elemental analyzer. Elemental analysis for Pd and Au was obtained using a PLASMA-SPEC(I) inductively coupled plasma (ICP) atomic emission spectrometer. Infrared (IR) spectrum was recorded on a Perkin Elmer Spectrum 1 spectrophotometer in 4000–450  $\text{cm}^{-1}$  region using a powdered sample on a KBr plate at 298 K. Thermogravimetric analysis (TGA) was collected on a NETZSCH STA 459F3 analyzer with a ramp rate of 10  $^\circ\text{C}$  per minute from 30  $^\circ\text{C}$  to 800  $^\circ\text{C}$  under air flow. Via transmission electron microscope (TEM, FEI Talos F200S), the size and morphology of metal NPs were detected. Through X-ray photoelectron spectroscopy (XPS, ESCALABMKLL) using Al K $\alpha$  X-rays, the surface elements and chemical states of **1** and  $\text{Pd}_{0.8}\text{Au}_{0.2}/\mathbf{1'}$  were analyzed. Through automatic volumetric adsorption equipment (Micromeritics ASAP 2020), the nitrogen sorption isotherms of **1** and  $\text{Pd}_{0.8}\text{Au}_{0.2}/\mathbf{1'}$  were measured.  $\text{H}_2$ ,  $\text{CO}_2$  and CO were analyzed by Shimadzu GC-8A gas chromatograph equipped with a thermal conductivity detector (TCD) and flame ionization detector (FID) methanator. Ultraviolet-Visible (UV-Vis) spectra were measured on a Shimadzu UV-1601PC spectrophotometer at room temperature.

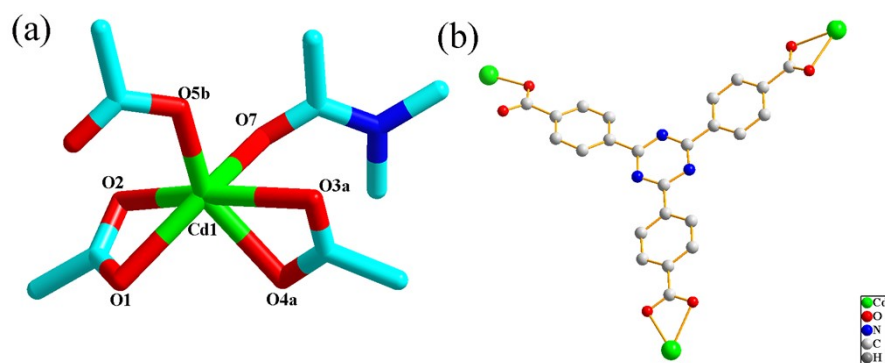

Fig. S1 Coordination environment around Cd1 (a) and coordination mode of  $L^{3-}$  (b) in **1** (a:  $x+1, -y, z+1/2$ ; b:  $x+2, -y+1, z+1/2$ ).

**Table S1.** Crystal data of **1**.

| Formula                     | $C_{32}H_{36.5}O_9N_{5.5}Cd$ <b>1</b> |
|-----------------------------|---------------------------------------|
| M                           | 753.9                                 |
| T (K)                       | 293 (2)                               |
| crystal system              | Monoclinic                            |
| space group                 | $P2_1/c$                              |
| $a$ (Å)                     | 15.7153 (5)                           |
| $b$ (Å)                     | 7.5751 (3)                            |
| $c$ (Å)                     | 31.3260 (8)                           |
| $\alpha$ (deg)              | 90.00                                 |
| $\beta$ (deg)               | 116.0710 (10)                         |
| $\gamma$ (deg)              | 90.00                                 |
| $V$ (Å <sup>3</sup> )       | 3349.76 (19)                          |
| $Z$ (mg·m <sup>3</sup> )    | 4                                     |
| $D_c$ (g·cm <sup>-3</sup> ) | 1.356                                 |
| $\mu$ (mm <sup>-1</sup> )   | 0.701                                 |
| reflections collected       | 42668                                 |
| Independent reflections     | 8297                                  |
| $R_{int}$                   | 0.0297                                |
| GOF                         | 1.079                                 |
| $R_1, I > 2\sigma(I)$       | 0.0402                                |
| $wR_2$ , all data           | 0.1140                                |

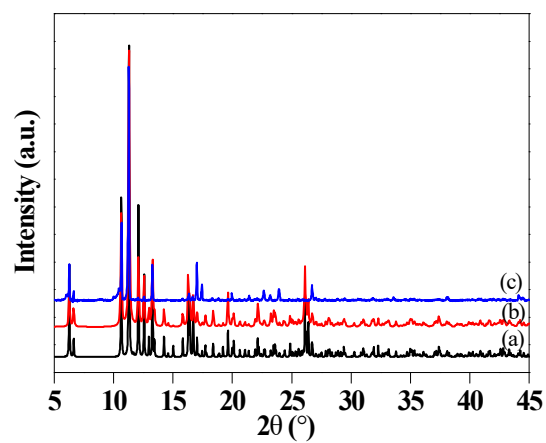

Fig. S2 Powder XRD patterns of simulated **1** (a), experimental **1** (b) and **1'** (c).

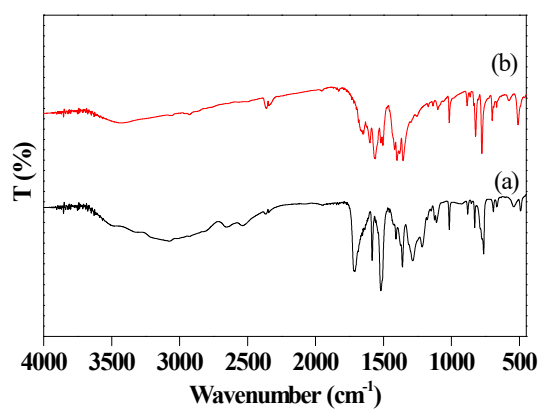

Fig. S3 IR spectra of **1** (a) and **1'** (b).

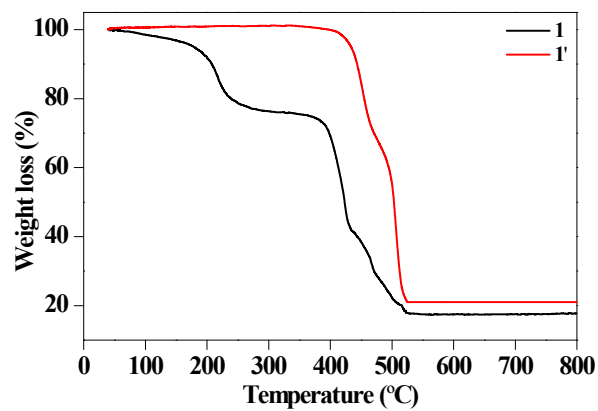

Fig. S4 TG curves of **1** and **1'** measured in air atmosphere.

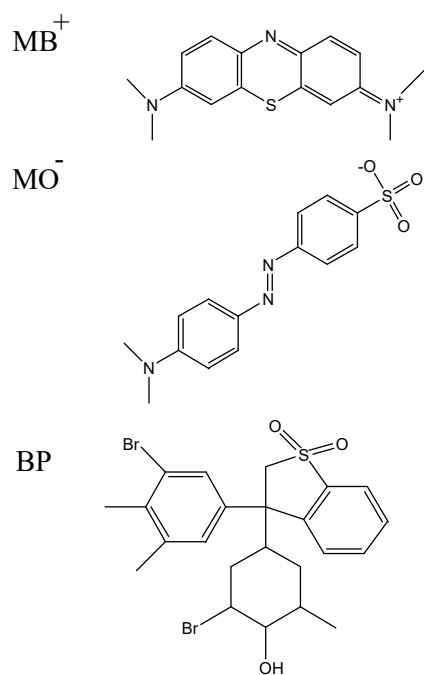

Scheme S1 Molecular structures of three organic dyes.

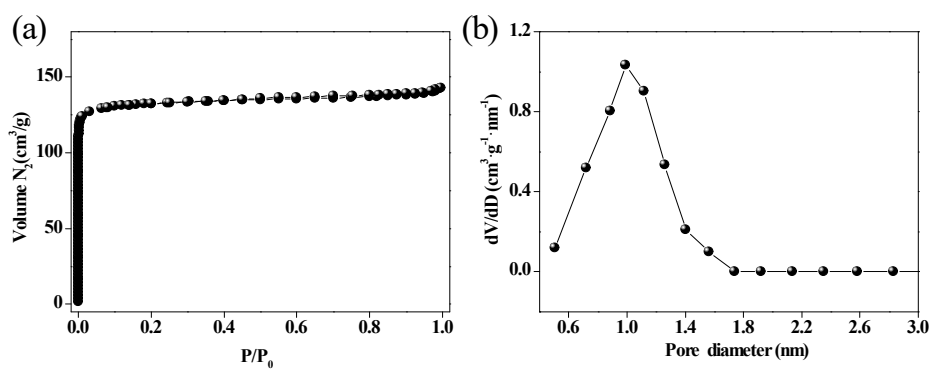

Fig. S5  $\text{N}_2$  adsorption-desorption isotherms and pore size distribution for  $1'$ .

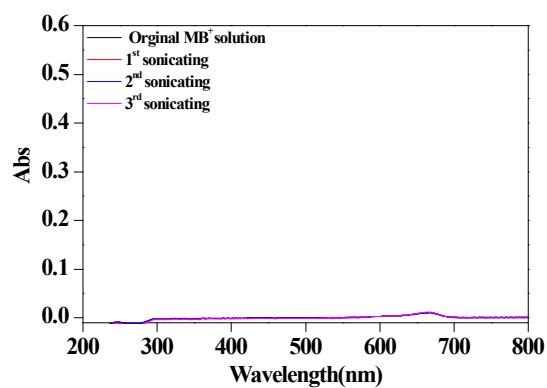

Fig. S6 Desorption amount of  $\text{MB}^+$  vs sonicating number plots for  $1'-1$ .

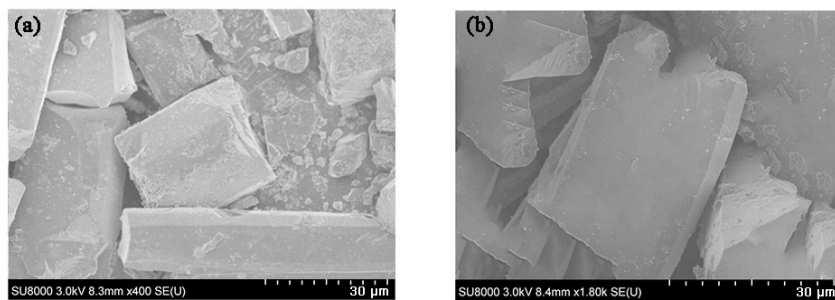

Fig. S7 SEM images of pure **1'** and **1'-1**(0.4 mg).

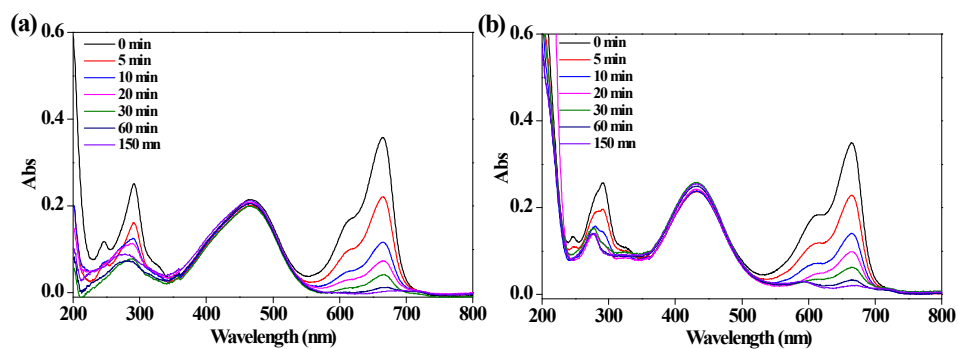

Fig. S8 UV-Vis spectra showing adsorption ability of **1'** to mixed dyes (a: MB<sup>+</sup>/MO<sup>-</sup>; b: MB<sup>+</sup>/BP).

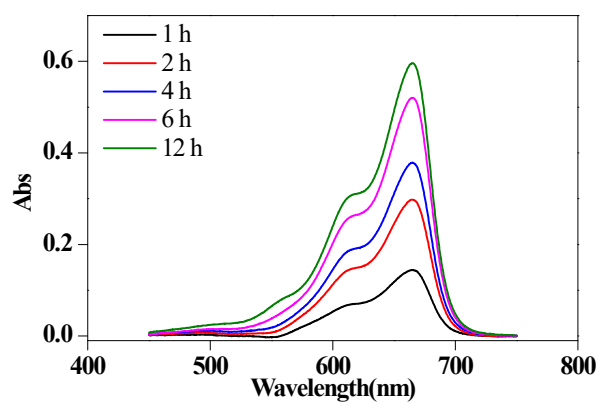

Fig. S9 UV-Vis spectra showing a release process of MB<sup>+</sup> dye from **1'**.

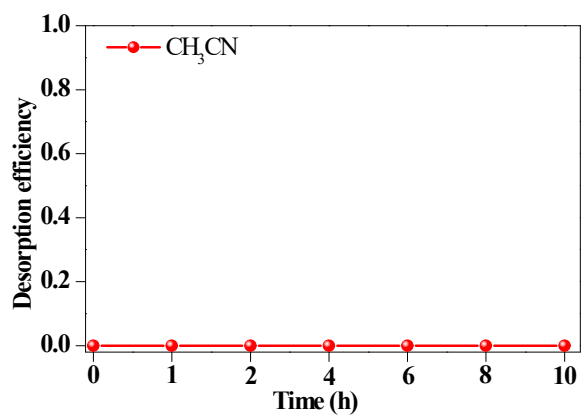

**Fig. S10** MB<sup>+</sup> desorption efficiency in pure CH<sub>3</sub>CN solution (removal efficiency= $(c_0-c_t)/c_0$ ,  $c_0$  represents the original concentration and  $c_t$  represents the instantaneous concentration at moment t).

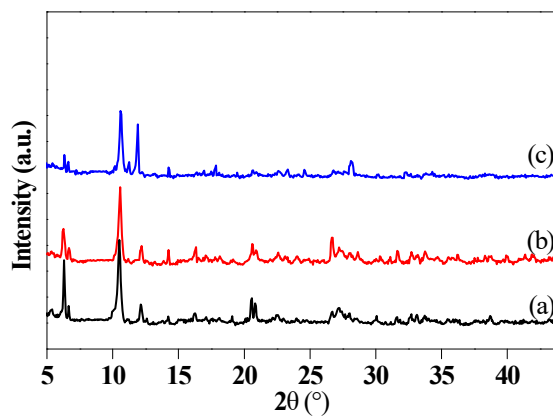

**Fig. S11** Powder XRD patterns of 1' (a), 1' after five times cycles of MB<sup>+</sup> adsorption (b) and 1' after five times cycles of MB<sup>+</sup> desorption (c).

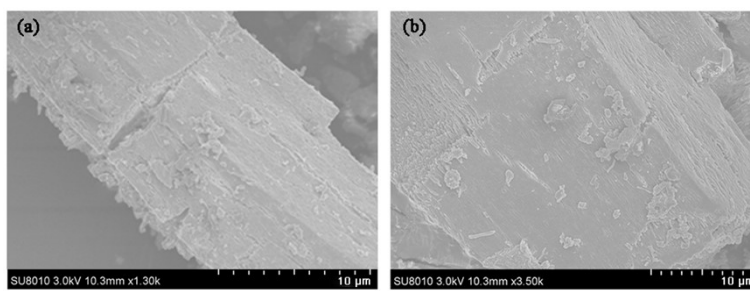

**Fig. S12** SEM image of 1'-2 and 1'-2 after five times sonicating.

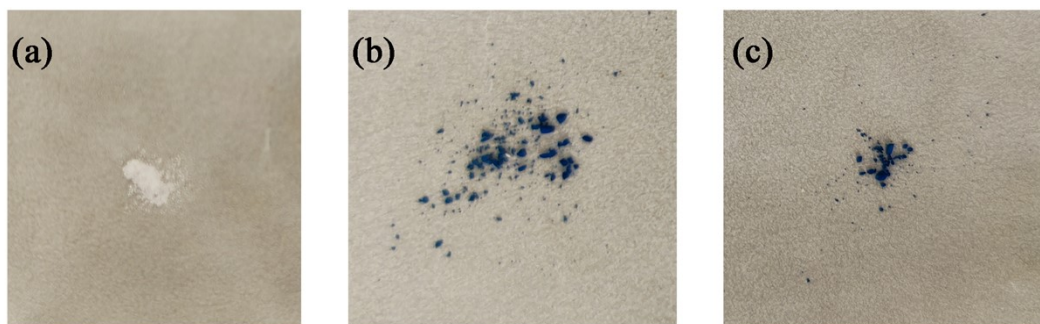

**Fig. S13** The photographs of 1' (a), 1'-2 and 1'-2 after five times sonicating (c).

**Equation S1**

$$\frac{t}{q_t} = \frac{I}{k_2 q_e^2} + \frac{I}{q_e} t \quad (S1)$$

where  $q_t$  represents adsorbed amount at moment  $t$  ( $\text{mg}\cdot\text{g}^{-1}$ ),  $q_e$  is adsorbed amount at equilibrium moment ( $\text{mg}\cdot\text{g}^{-1}$ ),  $t$  is adsorption time (min), and  $k_2$  is adsorption rate constant ( $\text{g}\cdot\text{mg}^{-1}\cdot\text{min}^{-1}$ ).

**Equation S2**

$$q_e = \frac{V(c_0 - c_e)}{m} \quad (S2)$$

In which  $q_e$ : equilibrium removal capacity ( $\text{mg}\cdot\text{g}^{-1}$ ),  $C_0$ : initial concentration of dye solution ( $\text{mg}\cdot\text{L}^{-1}$ ),  $C_e$ : equilibrium concentration of dye solution ( $\text{mg}\cdot\text{L}^{-1}$ ),  $V$ : solution volume (L), and  $m$ : adsorbate mass (g).

**Table S2.** A comparison of adsorption capacity of MB<sup>+</sup> for various materials.

| Adsorbents                                                                                                                                 | Adsorption capacity ( $\text{mg}\cdot\text{g}^{-1}$ ) | Reference |
|--------------------------------------------------------------------------------------------------------------------------------------------|-------------------------------------------------------|-----------|
| MOF-Fe                                                                                                                                     | 149.25                                                | 30        |
| Ce (III)-doped UiO-66                                                                                                                      | 145.3                                                 | 31        |
| Activated carbon                                                                                                                           | 400                                                   | 32        |
| NH <sub>2</sub> -UiO-66                                                                                                                    | 96.45                                                 | 32        |
| Fe <sub>3</sub> O <sub>4</sub> @Ag/SiO <sub>2</sub>                                                                                        | 128.5                                                 | 33        |
| HKUST-1                                                                                                                                    | 15.3                                                  | 34        |
| [(CH <sub>3</sub> ) <sub>2</sub> NH <sub>2</sub> ][In(L1)]·4H <sub>2</sub> O·2DMF                                                          | 281                                                   | 35        |
| MIL-100(Fe)                                                                                                                                | 736                                                   | 36        |
| [Ca(L2) <sub>2</sub> (H <sub>2</sub> O) <sub>2</sub> ]·1.5DMF                                                                              | 552                                                   | 37        |
| {[(CH <sub>3</sub> ) <sub>2</sub> NH <sub>2</sub> ] <sub>3</sub> (In <sub>3</sub> (L <sub>3</sub> ) <sub>4</sub> )}·(solvent) <sub>x</sub> | 724                                                   | 37        |
| [Zn <sub>2</sub> (L3)(L4) <sub>2</sub> ]·3.5H <sub>2</sub> O                                                                               | 140                                                   | 38        |
| Magnesium silicate                                                                                                                         | 602                                                   | 39        |
| H <sub>3</sub> PW <sub>12</sub> O <sub>40</sub> @ZIF-8                                                                                     | 810                                                   | 40        |
| <b>1'</b>                                                                                                                                  | 900                                                   | This work |

H<sub>4</sub>L1: 5-(3,5-dicarboxybenzamido)isophthalic acid;

HL2: 5,15-di(4-carboxyphenyl)porphyrin;

H<sub>3</sub>L3: 5'-(5-carboxy-1H-benzo[d]imidazol-2-yl)-[1,1':3',1''-terphenyl]-4,4''-dicarboxylic acid;

H<sub>2</sub>L4: tetrakis(4-pyridyloxymethylene)methane;

**Table S3.** Kinetic Parameters for MB<sup>+</sup> adsorption for various materials.

| Adsorbents                                                                              | Pseudo-second-order kinetic model |                                                       |       | Temperature/K | Reference |
|-----------------------------------------------------------------------------------------|-----------------------------------|-------------------------------------------------------|-------|---------------|-----------|
|                                                                                         | $C_0/\text{g}\cdot\text{L}^{-1}$  | $k_2/\text{g}\cdot\text{mg}^{-1}\cdot\text{min}^{-1}$ | $R^2$ |               |           |
| MOF-235                                                                                 | 40                                | $2.18 \times 10^{-4}$                                 | 0.998 | 298           | 42        |
| MIL-100 (Fe)                                                                            | 400                               | $0.936 \times 10^{-5}$                                | 0.995 | 303           | 36        |
| MIL-100 (Cr)                                                                            | 400                               | $1.713 \times 10^{-4}$                                | 0.997 | 303           | 36        |
| POM@Cu <sub>3</sub> (BTC) <sub>2</sub>                                                  | 20                                | $3.6 \times 10^{-3}$                                  | 0.991 | 298           | 43        |
| NH <sub>2</sub> -MIL-101 (Al)                                                           | 40                                | $(2.6\pm 1.3) \times 10^{-3}$                         | 0.999 | 303           | 44        |
| Fe <sub>3</sub> O <sub>4</sub> @MIL-100 (Fe)                                            | 60                                | $1.667 \times 10^{-5}$                                | 0.998 | 303           | 45        |
| $\{[(\text{CH}_3)_2\text{NH}_2]_3(\text{In}_3(\text{L}3)_4)\} \cdot (\text{solvent})_x$ | 15.72                             | $1.709 \times 10^{-3}$                                | 0.998 | 298           | 37        |
| <b>1'</b>                                                                               | 10                                | $0.7 \times 10^{-2}$                                  | 0.998 | 298           | This work |

## FA dehydrogenation catalytic tests

The FA dehydrogenation reaction was conducted in a two-necked round bottom flask with a condenser pipe. At a preset temperature (298 K, 313 K, 323 K and 333 K), 10 mg catalyst was firstly dispersed in 9.5 mL water and continuously stirred for 30 min. During the operation, 4M FA in 0.5 mL H<sub>2</sub>O was added into the flask via one neck and the other neck was connected to a gas measuring equipment. The experimental data were collected by measuring the volume of the gas released from FA at certain time intervals. The molar ratio of noble metal/FA was kept to be 0.00125. We evaluated the activity of the catalyst by calculating the initial turnover frequency (TOF) value (Eq. S3).<sup>46</sup>

$$TOF = \frac{PV_{H_2}}{n_{metal}t} \quad (S3)$$

In which  $P$  represents atmospheric pressure,  $V_{H_2}$  is the volume of generated H<sub>2</sub> when the gas conversion is 20 %,  $R$  is universal gas constant,  $T$  is the corresponding reaction temperature,  $n_{metal}$  is the mole numbers of (Pd+Au) in the **PdAu/1'** catalyst, and  $t$  is reaction time when the conversion is 20 %.

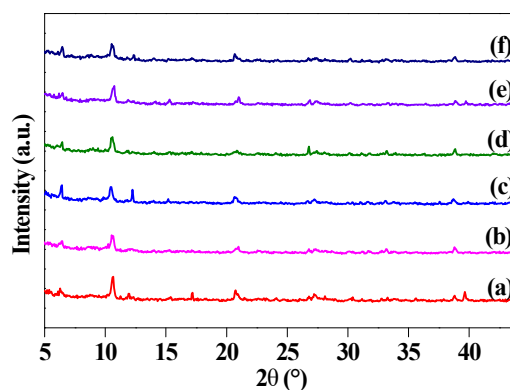

Fig. S14 Powder XRD patterns of **Pd/1'** (a), **Pd<sub>0.66</sub>Au<sub>0.33</sub>/1'** (b), **Pd<sub>0.5</sub>Au<sub>0.5</sub>/1'** (c), **Pd<sub>0.33</sub>Au<sub>0.66</sub>/1'** (d), **Pd<sub>0.2</sub>Au<sub>0.8</sub>/1'** (e) and **Au/1'** (f).

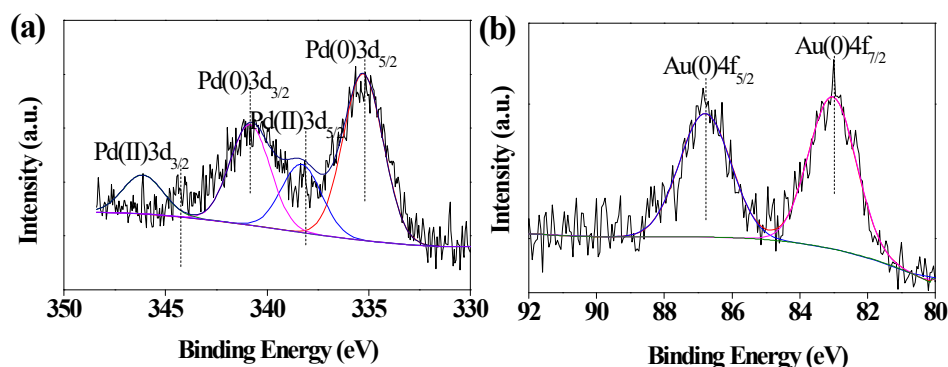

Fig. S15 XPS spectra of **Pd<sub>0.8</sub>Au<sub>0.2</sub>/1'** in Pd 3d and Au 4f.

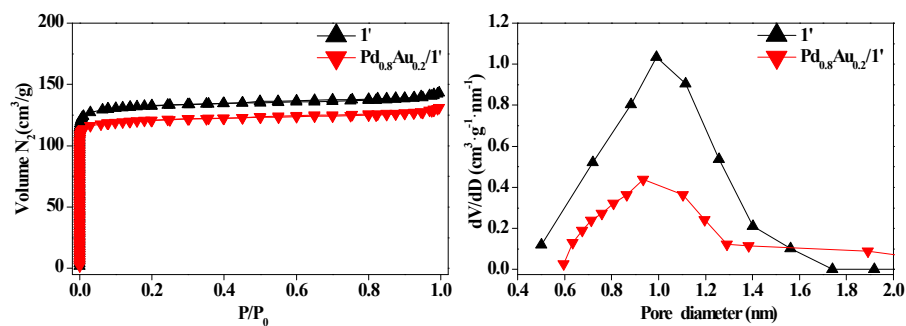

Fig. S16  $N_2$  adsorption-desorption isotherms of  $Pd_{0.8}Au_{0.2}/I'$  and  $I'$  (for comparison).

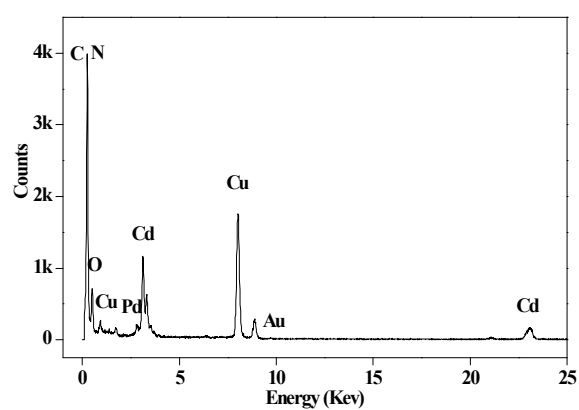

Fig. S17 EDX spectrum of fresh  $Pd_{0.8}Au_{0.2}/I'$ .

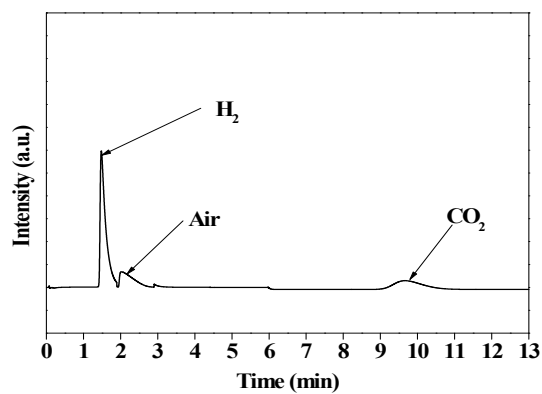

Fig. S18 GC spectrum using TCD detector for generated gas from FA solution over  $Pd_{0.8}Au_{0.2}/I'$  catalyst at 333 K.

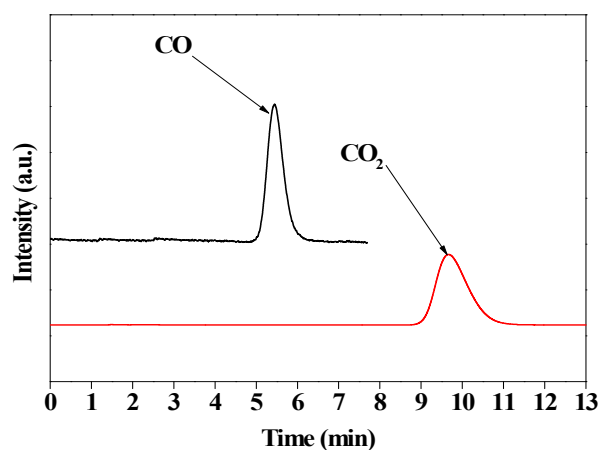

Fig. S19 GC spectra using FID-Methanator detector for commercial pure CO and generated gas from FA solution over  $\text{Pd}_{0.8}\text{Au}_{0.2}/1'$  catalyst at 333 K.

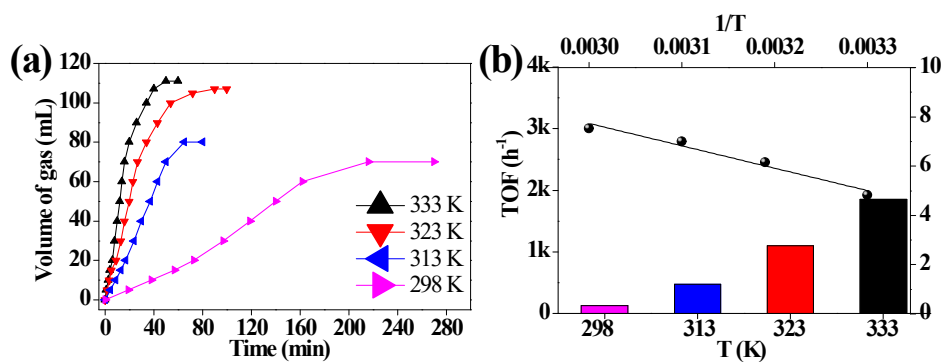

Fig. S20 Volume of generated gas mixture (mL) vs time (min) curves at different temperatures over fresh  $\text{Pd}_{0.8}\text{Au}_{0.2}/1'$  catalyst (a) and corresponding TOF value vs temperature as well as related Arrhenius plot (ln TOF vs 1/T) (b).

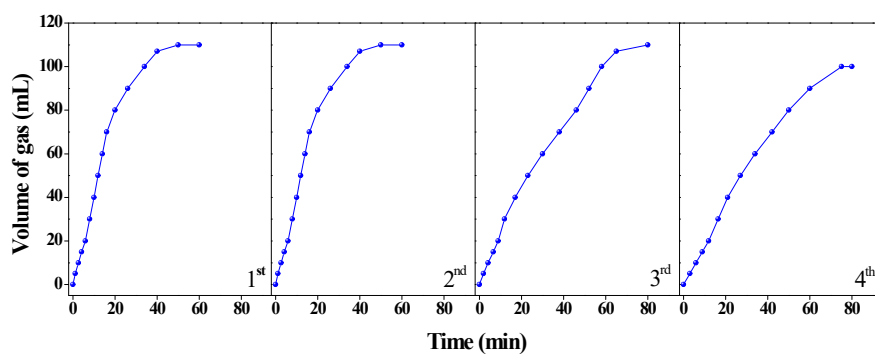

Fig. S21 Recyclability test for dehydrogenation of FA over  $\text{Pd}_{0.8}\text{Au}_{0.2}/1'$  catalyst at 333 K.

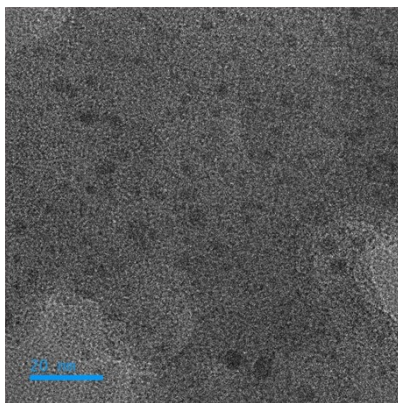

**Fig. S22** TEM image of  $\text{Pd}_{0.8}\text{Au}_{0.2}/\text{I}'$  after four times catalytic cycles.

**Equation S3.**

$$\text{TOF} = \frac{PV_{\text{H}_2}}{n_{\text{metal}}t} \quad (\text{S3})$$

In which  $P$  represents atmospheric pressure,  $V_{\text{H}_2}$  is the volume of generated  $\text{H}_2$  when the gas conversion is 20 %,  $R$  is universal gas constant,  $T$  is the corresponding reaction temperature,  $n_{\text{metal}}$  is the mole numbers of (Pd+Au) in the PdAu/UiO-66 catalyst, and  $t$  is reaction time when the conversion is 20 %.

**Equation S4.**

$$\ln k = \ln A - \frac{E_a}{RT} \quad (\text{S4})$$

Here,  $k$  is initial TOF,  $E_a$  is the activation energy ( $\text{kJ} \cdot \text{mol}^{-1}$ ),  $A$  is the pre-exponential factor,  $T$  is the absolute temperature and  $R$  is a constant ( $8.314 \text{ J} \cdot \text{mol}^{-1} \cdot \text{K}^{-1}$ ).

**Table S4.** BET surface areas, pore volumes and element analysis of **1'** and **Pd<sub>0.8</sub>Au<sub>0.2</sub>/1'**.

| Samples                                    | S <sub>BET</sub><br>(m <sup>2</sup> ·g <sup>-1</sup> ) | V <sub>pore</sub> (cm <sup>3</sup> ·g <sup>-1</sup> ) | ICP<br>n <sub>(Pd+Au)</sub> /n <sub>Cd</sub> |
|--------------------------------------------|--------------------------------------------------------|-------------------------------------------------------|----------------------------------------------|
| <b>1'</b>                                  | 527                                                    | 0.42                                                  | -                                            |
| <b>Pd<sub>0.8</sub>Au<sub>0.2</sub>/1'</b> | 466                                                    | 0.36                                                  | 0.125                                        |

**Table S5.** Comparison of the catalytic performance of **Pd<sub>0.8</sub>Au<sub>0.2</sub>/1'** presented in this work with the previously reported heterogeneous catalysts for FA decomposition.

| Catalyst                                                 | T (K) | TOF* (h <sup>-1</sup> ) | Conversion (%) | Reference |
|----------------------------------------------------------|-------|-------------------------|----------------|-----------|
| <b>Pd<sub>0.8</sub>Au<sub>0.2</sub>/1'</b>               | 333   | 1854                    | 92             | This work |
| Ag <sub>1</sub> Pd <sub>4</sub> @NH <sub>2</sub> -UiO-66 | 353   | 873                     | 100            | 54        |
| Au <sub>2</sub> Pd <sub>8</sub> /SBA-15-Amine            | 333   | 1786                    | 98             | 55        |
| PdAu/C-P                                                 | 333   | 808.6                   | 100            | 56        |
| AuPd/n-CNS-Th-160                                        | 333   | 1896                    | 98             | 57        |
| Ag <sub>18</sub> Pd <sub>82</sub> @ZIF-8                 | 353   | 580                     | 100            | 58        |
| Ag <sub>20</sub> Pd <sub>80</sub> @MIL-101               | 353   | 848                     | 96             | 59        |
| AuPd@ED-MIL-101                                          | 363   | 106                     | 95             | 60        |
